# Supplementary material
Source: Copernicus journal article supplement (doi:10.5194/egusphere-2026-981)
Supplement: Supplementary file [file egusphere-2026-981-AC2-supplement.pdf]

**Egusphere-2026-981**

**Response to Reviewer 2's comments.**

**General comments**

This study provides a high-quality assessment of existing green roof models, addressing a gap in the literature. Overall, I find the evaluation scientifically sound and the discussion insightful.

Response:

*We sincerely thank the reviewer for this encouraging comment and for recognizing the value of our work in addressing this gap in the literature.*

**Specific comments**

I have two minor suggestions:

1. Move the green roof variable setup from the supplement into the main manuscript (currently Table S3).

Response:

*The green roof variable setup previously presented in Table S3 has been moved to the main manuscript and is now included as Table 2 in the “Model setup” subsection (l. 199).*

*Note: All line numbers refer to the clean version of the manuscript.*

2. Present time-series plot or scatter plots in addition to time-averaged results to show deviations during dry and rainy periods for different fluxes.

Response:

*Figure S6 has been added to the supplementary materials to illustrate model behavior at the hourly scale under dry and rainy conditions, complementing the time-averaged results in the main text. The scatter plots provide the full distribution of hourly model–observation pairs and show the same dry-versus-rainy contrasts in bias and spread observed in the time-averaged results.*

We thank the reviewer for these suggestions and hope the revisions are satisfactory.

Sincerely,

Maria Martinez Mendoza
